# Supplementary material
Source: Springer Nature journal article supplement (https://www.springermedizin.de/resource/supplementary/13221_2011_20_MOESM4_ESM.pdf/9680784)

**A**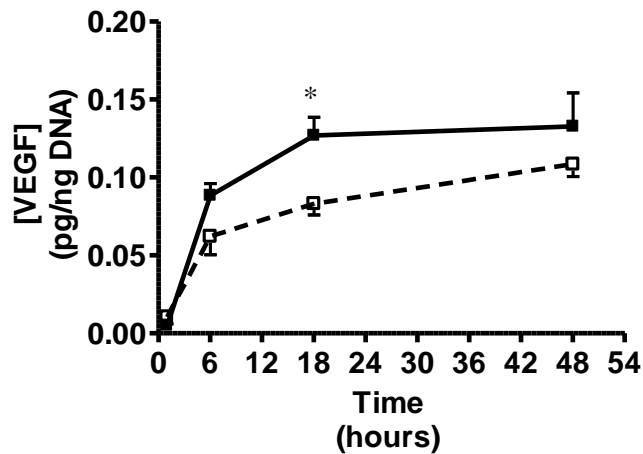**B**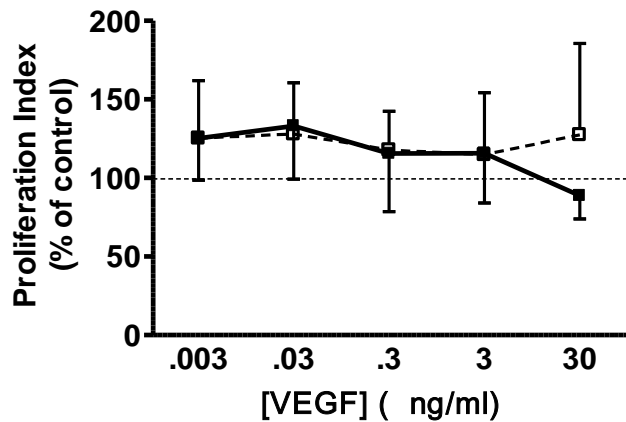**C**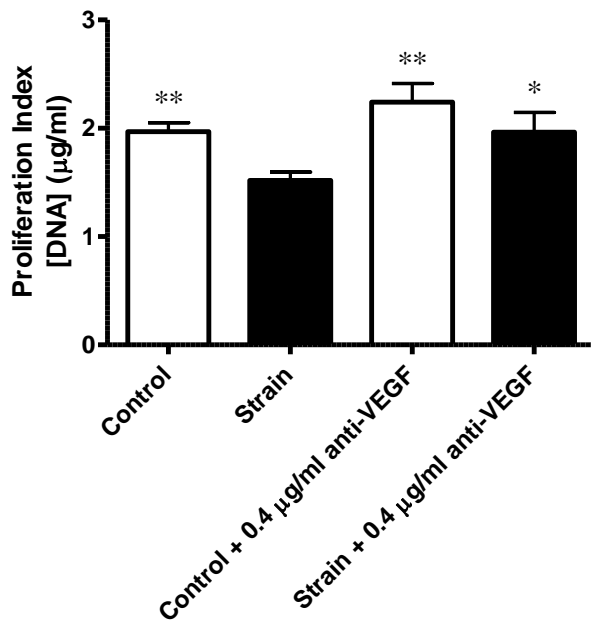

Supplement: MOESM4 [file 9680784]
